# Supplementary material for: An SCFFBXO28 E3 Ligase Protects Pancreatic β-Cells from Apoptosis
Source: PubMed Central journal article supplement (PMC5979299; doi:10.3390/ijms19040975), 2018-03-24
Supplement: ijms-19-00975-s001.pdf [file ijms-19-00975-s001.pdf]

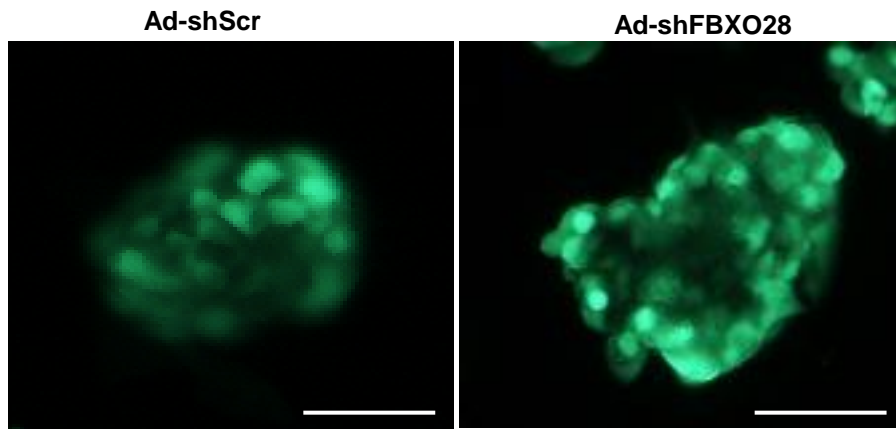

**Supplementary Figure 1.** Representative immunofluorescence of GFP in infected human islets with Ad-GFP-shScr control or Ad-GFP-shFBXO28. Scale bar represents 50 $\mu$ m.
